# Supplementary material for: Synthesis, characterization and use of enzyme cashew gum nanoparticles for biosensing applications
Source: Royal Society of Chemistry journal article supplement (doi:10.1039/d1tb01164b), 2021-01-01
Supplement: d1tb01164b1.pdf [file d1tb01164b1.pdf]

## SUPPORTING INFORMATION

### SYNTHESIS, CHARACTERIZATION AND USE OF ENZYME CASHEW GUM NANOPARTICLES FOR BIOSENSING APPLICATIONS

Adriany das Graças Nascimento Amorim<sup>a,1</sup>, Marta Sánchez-Paniagua<sup>b,1</sup>, Taiane Maria de  
Oliveira<sup>a</sup>, Ana Carolina Mafud<sup>c</sup>, Durcilene Alves Da Silva<sup>a</sup>, José Roberto de Souza de  
Almeida Leite<sup>d</sup>, Beatriz López-Ruiz<sup>b</sup>

<sup>a</sup>*Biodiversity and Biotechnology Research Center, Federal University of Piauí, 64202-020,  
Parnaíba-PI, Brazil.*

<sup>b</sup> *Chemistry in Pharmaceuticals Sciences Department, Faculty of Pharmacy, Complutense  
University of Madrid, Ciudad Universitaria, 28240, Madrid, Spain.*

<sup>c</sup>*São Carlos Institute of Physics, University of São Paulo, USP, São Carlos, 13565-905, São  
Paulo, Brazil.*

<sup>d</sup>*Morphology Area, Faculty of Medicine, University of Brasília (UnB), Campus Darcy  
Ribeiro, Asa Norte, Brasília-DF, 70910-900, Brazil.*

\* Corresponding Author: Prof. Dra. Beatriz López Ruiz, PhD. Departamento de Química en  
Ciencias Farmacéuticas, Facultad de Farmacia, Universidad Complutense de Madrid, Ciudad  
Universitaria, 28240, Madrid, Spain. e-mail: [bealopru@ucm.es](mailto:bealopru@ucm.es)

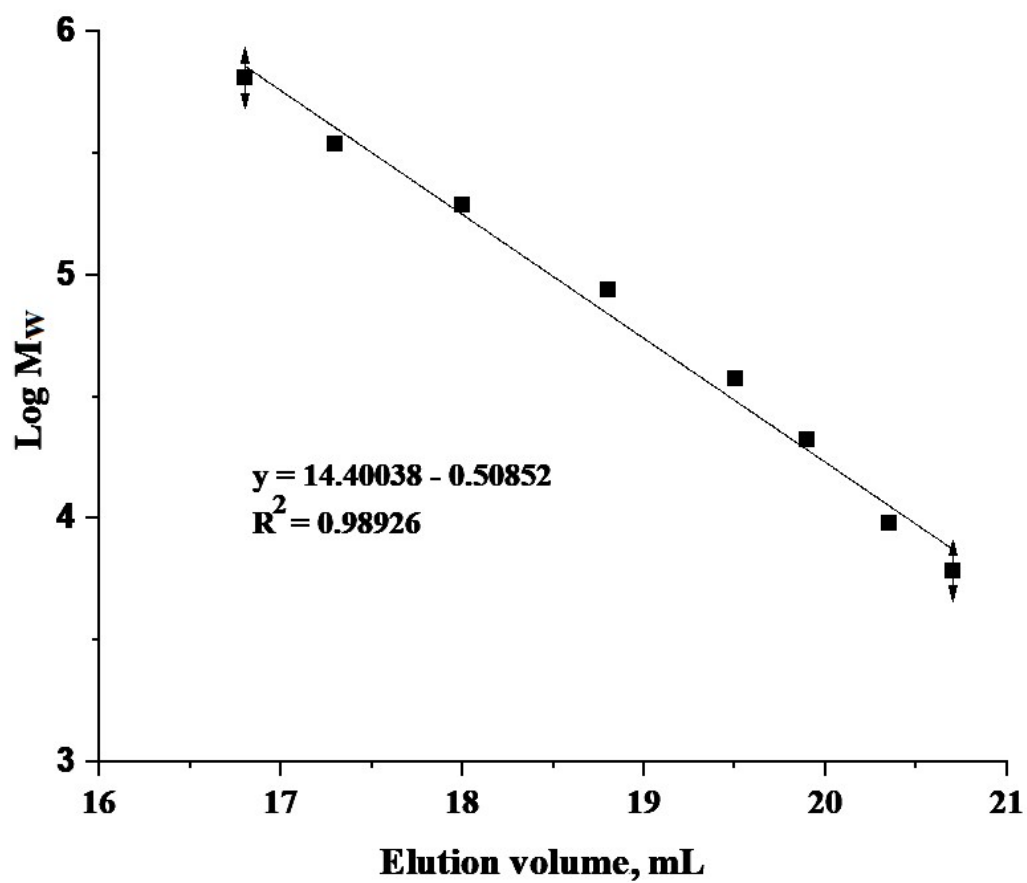

Figure S1. Calibration curve for molecular mass determination using gel permeation chromatography.

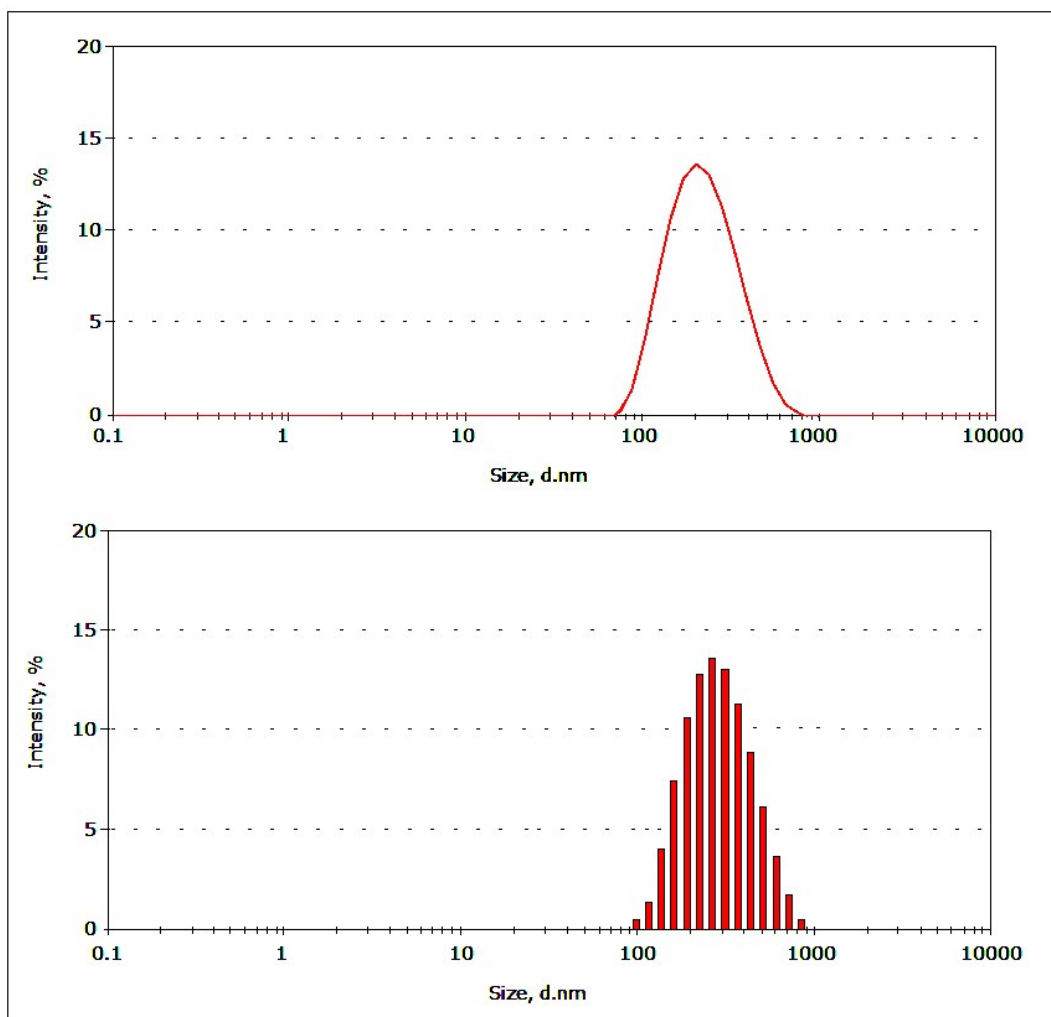

**Figure S2.** Particle size distribution of LacCG-NPs (10:5 ratio) by DLS suspended in PBS 0.1M pH 7.0.

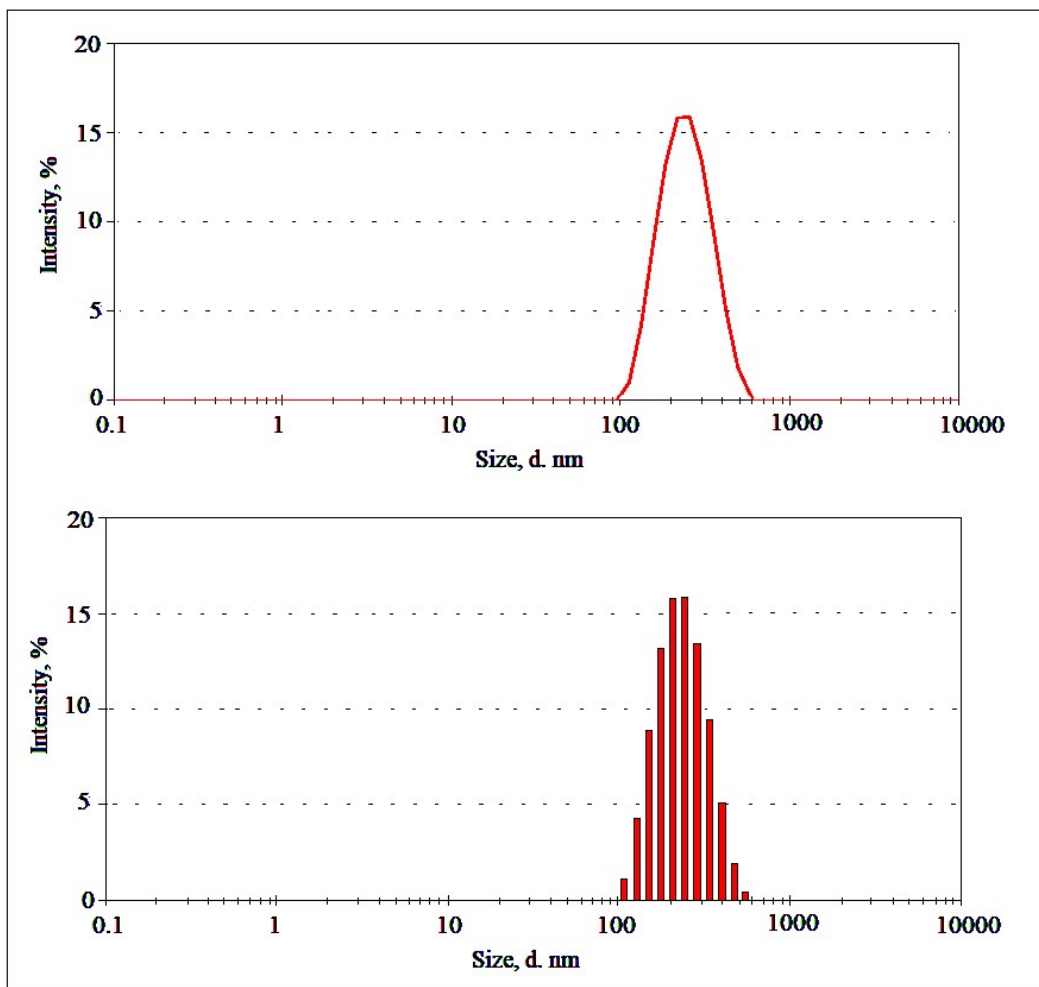

**Figure S3.** Particle size distribution of CG-NPs by DLS suspended in PBS 0.1M pH 7.0.
